# Supplementary material for: Topology of RNA–protein nucleobase–amino acid π–π interactions and comparison to analogous DNA–protein π–π contacts
Source: PubMed Central journal article supplement — RNA. 2016 May;22(5):696–708. doi: 10.1261/rna.054924.115 (PMC4836644; doi:10.1261/rna.054924.115), 2016-05
Supplement: supp_054924.115_SuppMaterial.pdf [file supp_054924.115_SuppMaterial.pdf]

# Topology of RNA–protein nucleobase–amino acid $\pi$ – $\pi$ interactions and comparison to analogous DNA–protein $\pi$ – $\pi$ contacts

Katie A. Wilson, Devany J. Holland and Stacey D. Wetmore\*

*Department of Chemistry and Biochemistry, University of Lethbridge, 4401 University Drive West, Lethbridge, Alberta Canada, T1K 3M4*

## Supplementary Material

|                                                                                                                                                                                                                                              |     |
|----------------------------------------------------------------------------------------------------------------------------------------------------------------------------------------------------------------------------------------------|-----|
| <b>Supp. Table S1.</b> 3DNA-SNAP results vs our methodology .....                                                                                                                                                                            | S2  |
| <b>Supp. Table S2.</b> Edge Interacting .....                                                                                                                                                                                                | S2  |
| <b>Supp. Table S3.</b> Comparison of the relative orientation (tilt angle) .....                                                                                                                                                             | S3  |
| <b>Supp. Table S4.</b> Comparison of the relative orientation (distance) .....                                                                                                                                                               | S4  |
| <b>Supp. Figure S1.</b> Examples of $\pi$ – $\pi$ interactions .....                                                                                                                                                                         | S5  |
| <b>Supp. Figure S2.</b> Models used in current study.....                                                                                                                                                                                    | S6  |
| <b>Supp. Figure S3.</b> Approach used in current study .....                                                                                                                                                                                 | S6  |
| <b>Supp. Figure S4.</b> Examples of previously incorrectly identified RNA–protein $\pi$ – $\pi$ interactions .....                                                                                                                           | S7  |
| <b>Supp. Figure S5.</b> Frequency of the closest heavy atom distance in the non-redundant dataset .....                                                                                                                                      | S8  |
| <b>Supp. Figure S6.</b> Number of contacts in each crystal structure in the full dataset.....                                                                                                                                                | S9  |
| <b>Supp. Figure S7.</b> Amino acid and nucleobase proportions in the full dataset .....                                                                                                                                                      | S10 |
| <b>Supp. Figure S8.</b> Frequency of the tilt angles in the full dataset .....                                                                                                                                                               | S11 |
| <b>Supp. Figure S9.</b> Frequency of the closest heavy atom distance in the full dataset.....                                                                                                                                                | S12 |
| <b>Supp. Figure S10.</b> Frequency of interaction energies in the full dataset .....                                                                                                                                                         | S13 |
| <b>Supp. Figure S11.</b> Overall number of DNA–protein $\pi$ – $\pi$ contacts.....                                                                                                                                                           | S14 |
| <b>Supp. Table S5.</b> PDB IDs for the crystal structures included in the full and non-redundant datasets in the present work, as well as the type(s) of interactions identified and the nucleobase/sugar–amino acid residues involved. .... | S15 |

Supplementary Table S1: Comparison of the contacts found using 3DNA-SNAP and our methodology for representative crystal structures.

|      | Amino Acid | Nucleobase | Tilt <sup>a</sup> | Our Methodology <sup>b</sup> | 3DNA-SNAP <sup>c</sup> |
|------|------------|------------|-------------------|------------------------------|------------------------|
| 1FXL | Y-A-45     | U-B-5      | 10.82             | Yes                          | Yes                    |
|      | F-A-84     | U-B-9      | 64.85             | Yes                          | No                     |
|      | F-A-84     | U-B-10     | 14.40             | Yes                          | Yes                    |
|      | Y-A-128    | U-B-3      | 5.45              | Yes                          | Yes                    |
|      | F-A-170    | U-B-4      | 4.73              | Yes                          | Yes                    |
| 1DFU | Y-P-31     | A-N-73     | 85.16             | Yes                          | No                     |
| 1H2C | F-A-125    | G-R-2      | 10.47             | Yes                          | Yes                    |
|      | Y-A-171    | A-R-3      | 74.97             | Yes                          | No                     |
| 2PXK | R-A-50     | A-B-140    | 47.63             | Yes                          | Yes                    |
| 3L25 | F-B-239    | C-F-1      | 73.40             | Yes                          | No                     |
|      | F-E-239    | C-C-1      | 74.83             | Yes                          | No                     |
| 3G9Y | W-A-79     | G-C-2      | 8.77              | Yes                          | Yes                    |
|      | W-A-79     | G-C-3      | 10.39             | Yes                          | Yes                    |

<sup>a</sup>Interplanar angle between the two  $\pi$ -systems (See Supp. Fig. S1). <sup>b</sup>See methods.

<sup>c</sup>Version beta-r06-2015oct23 (Lu 2008).

Supplementary Table S2: Most common amino acid or nucleobase edges involved in  $\pi$ - $\pi$  interactions in nature with an interplanar (tilt) angle greater than 45°.

| Residue Edge | Edge Type     | Atoms Involved <sup>a</sup> | Frequency in Full Dataset | Frequency in Non-redundant dataset |
|--------------|---------------|-----------------------------|---------------------------|------------------------------------|
| F            | Bridge        | CHCH                        | 52%                       | 55%                                |
| F            | Single Proton | CH                          | 15%                       | 10%                                |
| C            | Bridge        | C5HC6H                      | 6%                        | 10%                                |
| D            | Single Atom   | O $\delta$                  | 5%                        | 0%                                 |
| U            | Bridge        | N1HC6H                      | 5%                        | 7%                                 |
| Y            | Bridge        | C $\epsilon$ HC $\zeta$ OH  | 3%                        | 3%                                 |
| R            | Bridge        | N $\eta$ HN $\eta$ H        | 2%                        | 0%                                 |
| R            | Bridge        | N $\epsilon$ HC $\delta$ H  | 2%                        | 0%                                 |
| E            | Single Atom   | O $\epsilon$                | 2%                        | 3%                                 |
| W            | Bridge        | C $\epsilon$ HC $\zeta$ H   | 2%                        | 0%                                 |
| Y            | Bridge        | C $\delta$ HC $\epsilon$ H  | 2%                        | 3%                                 |
| Y            | Single Proton | C $\delta$ H                | 2%                        | 3%                                 |
| C            | Lone Pair     | O2                          | 2%                        | 3%                                 |
| A            | Bridge        | N9HN3                       | 2%                        | 3%                                 |
| A            | Lone Pair     | N3                          | 2%                        | 0%                                 |

<sup>a</sup>See Supp. Fig. S2 for atomic numbering.

Supplementary Table S3: Comparison of the relative orientation (tilt angle or  $\omega$ , degrees) of different nucleobase–amino acid  $\pi$ –systems in RNA or DNA–protein  $\pi$ –interactions found in nature as a function of the nucleobase.

|               | RNA   |                         |             | DNA <sup>a</sup> |             |           |
|---------------|-------|-------------------------|-------------|------------------|-------------|-----------|
|               | Range | Most Common             | Mean        | Range            | Most Common | Mean      |
| A (cyclic)    | 0-90  | 5-10 (39%)              | 28.2 ± 32.8 | 0-90             | 5-10 (25%)  | 25.0±26.4 |
| U/T (cyclic)  | 0-90  | 10-15 (25%)             | 29.5 ± 30.1 | 0-90             | 5-10 (31%)  | 20.6±23.1 |
| G (cyclic)    | 0-90  | 20-25 (38%)             | 19.2 ± 14.4 | 0-90             | 10-15 (17%) | 25.6±23.1 |
| C (cyclic)    | 0-90  | 0-5 (22%)               | 34.9 ± 29.1 | 0-90             | 5-10 (26%)  | 26.8±24.4 |
| A (acyclic)   | 0-85  | 0-5 (19%)<br>5-10 (19%) | 19.7 ± 16.7 | 0-90             | 5-10 (22%)  | 35.3±28.8 |
| U/T (acyclic) | 5-25  | 20-25 (50%)             | 18.6 ± 4.4  | 0-90             | 5-10 (17%)  | 34.7±32.0 |
| G (acyclic)   | 5-65  | 5-10 (45%)              | 18.6 ± 16.8 | 0-90             | 5-10 (15%)  | 50.4±30.6 |
| C (acyclic)   | 0-80  | 75-80 (21%)             | 36.5 ± 26.7 | 0-90             | 20-25 (16%) | 42.7±27.2 |

<sup>a</sup>Reference Wilson, *et al.*, 2015.

Supplementary Table S4: Comparison of the distance (Å) between nucleobase–amino acid  $\pi$ –systems in RNA or DNA–protein  $\pi$ –interactions found in nature as a function of the nucleobase

|               | RNA     |                                |               | DNA <sup>a</sup> |                                |             |
|---------------|---------|--------------------------------|---------------|------------------|--------------------------------|-------------|
|               | Range   | Most Common                    | Mean          | Range            | Most Common                    | Mean        |
| A (cyclic)    | 2.7-4.0 | 3.4-3.5 (32%)                  | 3.369 ± 0.173 | 2.9-4.3          | 3.4-3.5 (23%)                  | 3.493±0.315 |
| U/T (cyclic)  | 2.8-4.3 | 3.4-3.5 (22%)                  | 3.483 ± 0.314 | 2.6-4.0          | 3.4-3.5 (28%)                  | 3.459±0.213 |
| G (cyclic)    | 2.9-3.8 | 3.1-3.2 (20%)                  | 3.217 ± 0.193 | 3.1-4.3          | 3.3-3.4 (20%)                  | 3.492±0.209 |
| C (cyclic)    | 3.0-4.1 | 3.3-3.4 (22%)<br>3.4-3.5 (22%) | 3.436 ± 0.200 | 2.9-4.3          | 3.4-3.5 (17%)                  | 3.479±0.215 |
| A (acyclic)   | 2.7-3.8 | 3.4-3.5 (26%)                  | 3.305 ± 0.209 | 2.9-4.5          | 3.3-3.4 (19%)<br>3.4-3.5 (21%) | 3.489±0.302 |
| U/T (acyclic) | 2.9-3.7 | 3.5-3.6 (30%)                  | 3.373 ± 0.202 | 2.8-4.3          | 3.5-3.6 (21%)                  | 3.493±0.275 |
| G (acyclic)   | 2.9-3.9 | 3.3-3.4 (27%)                  | 3.304 ± 0.228 | 2.9-4.8          | 3.1-3.2 (19%)                  | 3.421±0.382 |
| C (acyclic)   | 2.9-3.6 | 3.1-3.2 (36%)                  | 3.245 ± 0.199 | 2.8-4.7          | 3.3-3.4 (12%)                  | 3.651±0.494 |

<sup>a</sup>Reference Wilson, *et al.*, 2015.

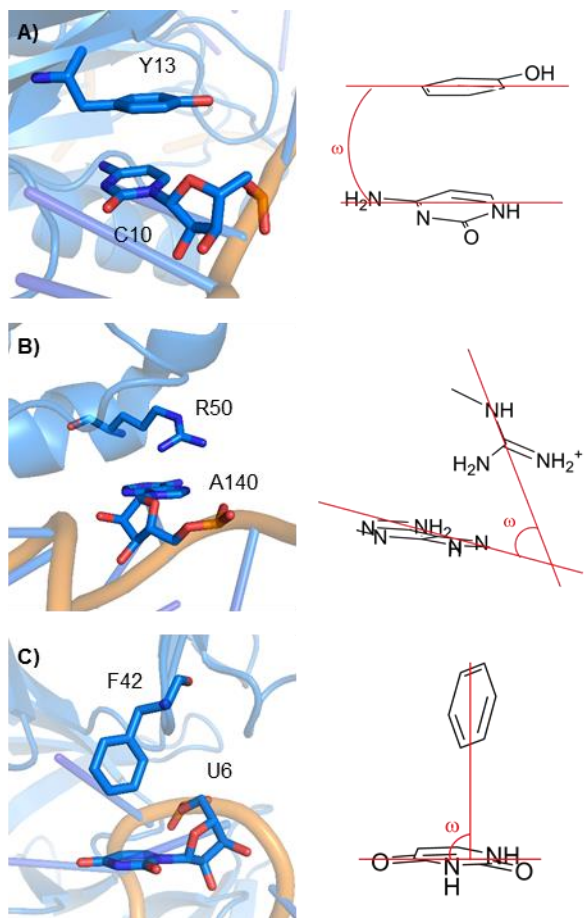

Supplementary Figure S1. Examples of (a) a RNA–protein stacking interaction (PDB ID: 1URN), (b) a RNA–protein inclined interaction (PDB ID: 2PXK), and (c) a RNA–protein stacking interaction (PDB ID: 3RER).

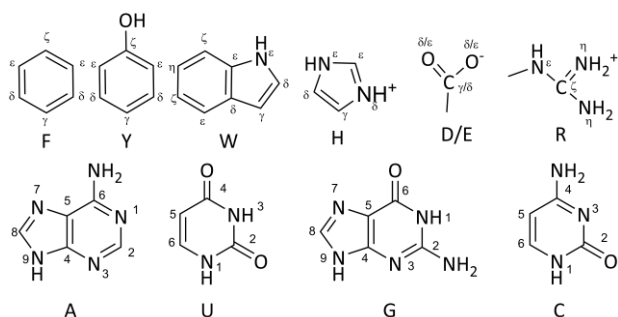

Supplementary Figure S2. Models used in the current study for the nucleobases and amino acids to calculate the interaction energies, as well as the chemical numbering of each residue.

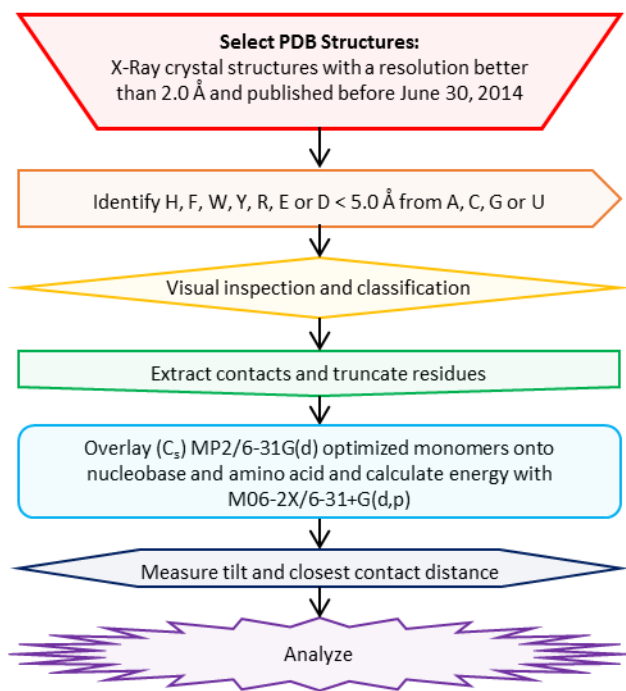

Supplementary Figure S3. Approach used in the current study to identify and classify RNA-protein nucleobase-amino acid  $\pi$ - $\pi$  interactions. For full description of our approach see the Methods section in the main manuscript.

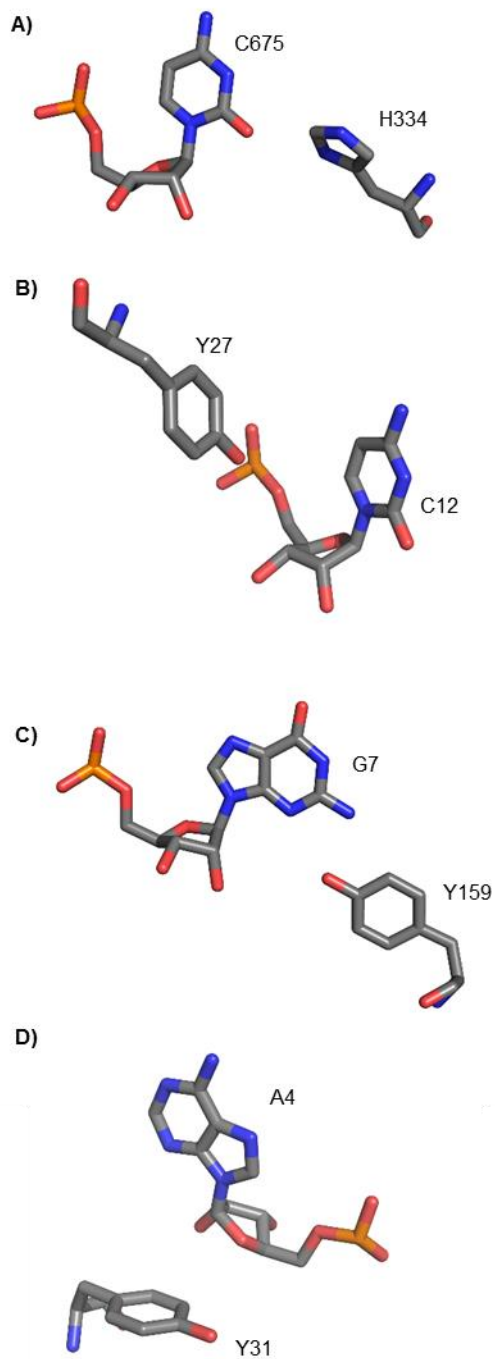

Supplementary Figure S4. Previously identified RNA–protein nucleobase–amino acid  $\pi$ – $\pi$  contacts through the use of automated search routines (Baker and Grant 2007) that instead represent A) a non-interacting pair (PDB ID: 1ASZ), B) a phosphate interaction (PDB ID: 1E8O), C) a nucleobase–amino acid hydrogen bonding (PDB ID: 1U63), and D) a ribose interactions (PDB ID: 1DFU).

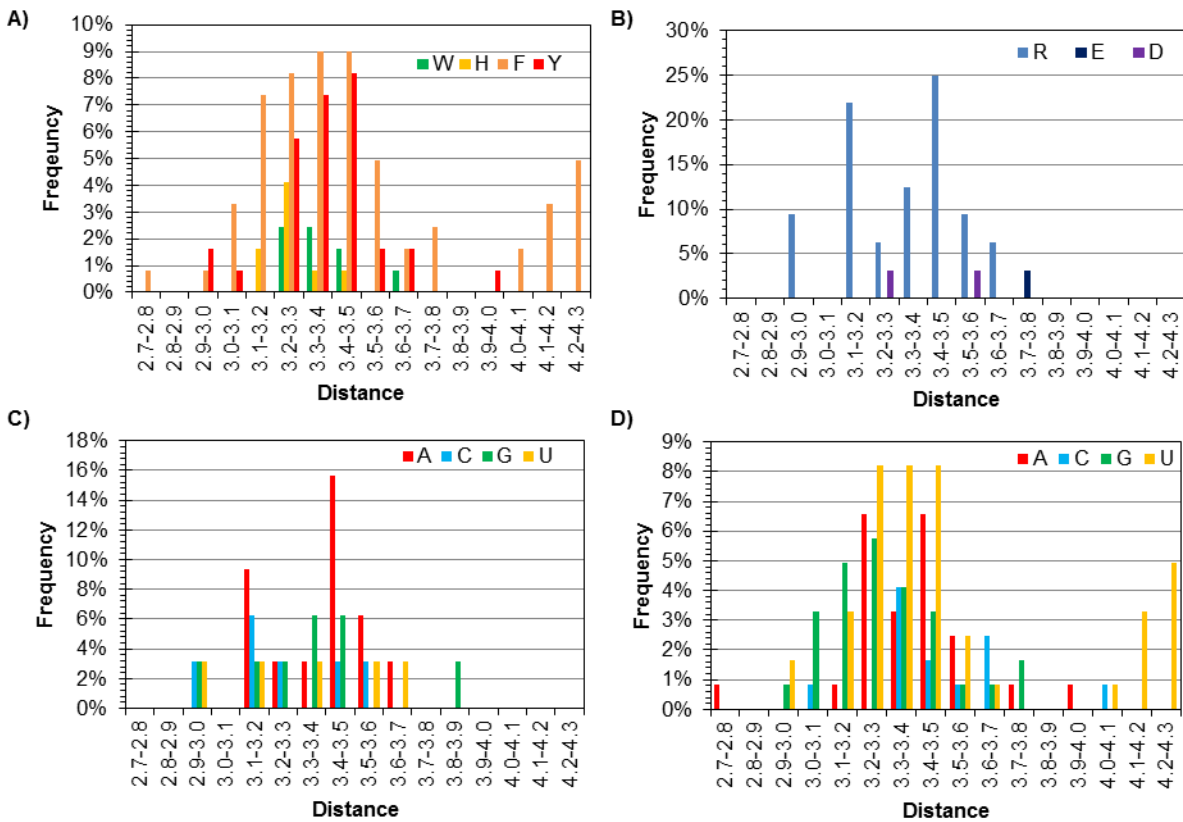

Supplementary Figure S5. Frequency of the closest heavy atom distance for  $\pi$ - $\pi$  contacts in the non-redundant dataset as a function of the protein (a and b) or RNA (c and d) component for the cyclic (a and c) and acyclic (b and d) amino acids.



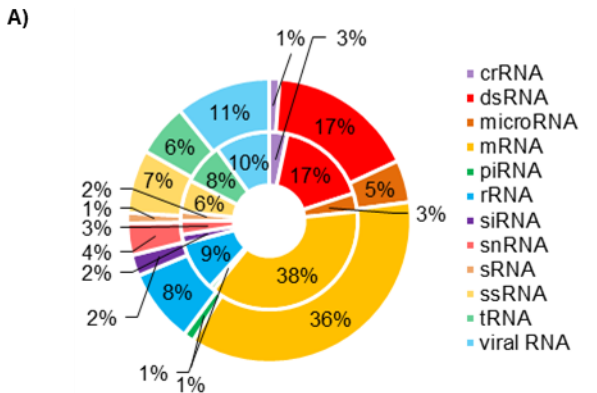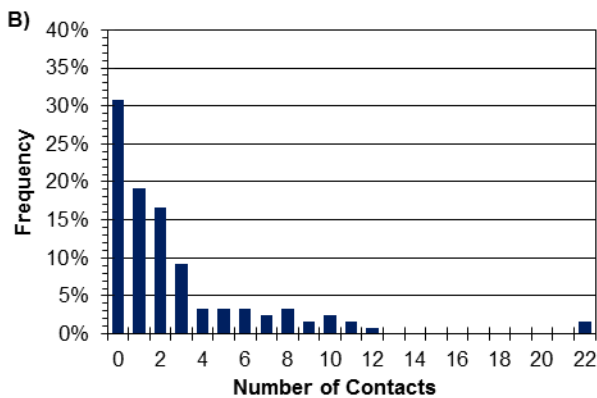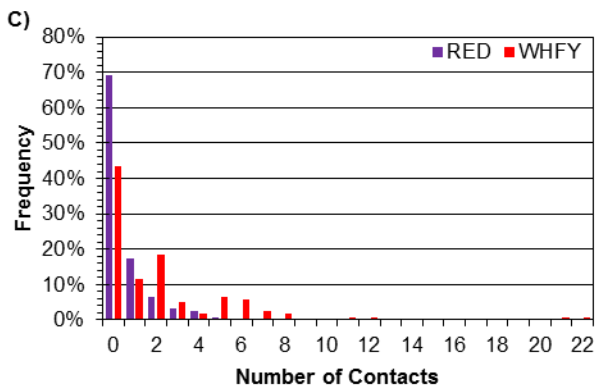

Supplementary Figure S6. A) Distribution in the RNA types searched (inner circle) and the RNA types that form at least one protein  $\pi$ - $\pi$  contact (outer circle) in the full dataset. B) Overall number of RNA-protein  $\pi$ - $\pi$  contacts found in each crystal structure searched in the full dataset. C) Number of RNA-protein  $\pi$ - $\pi$  contacts found in each crystal structure searched as a function of the amino acid (cyclic versus acyclic) classification in the full dataset.

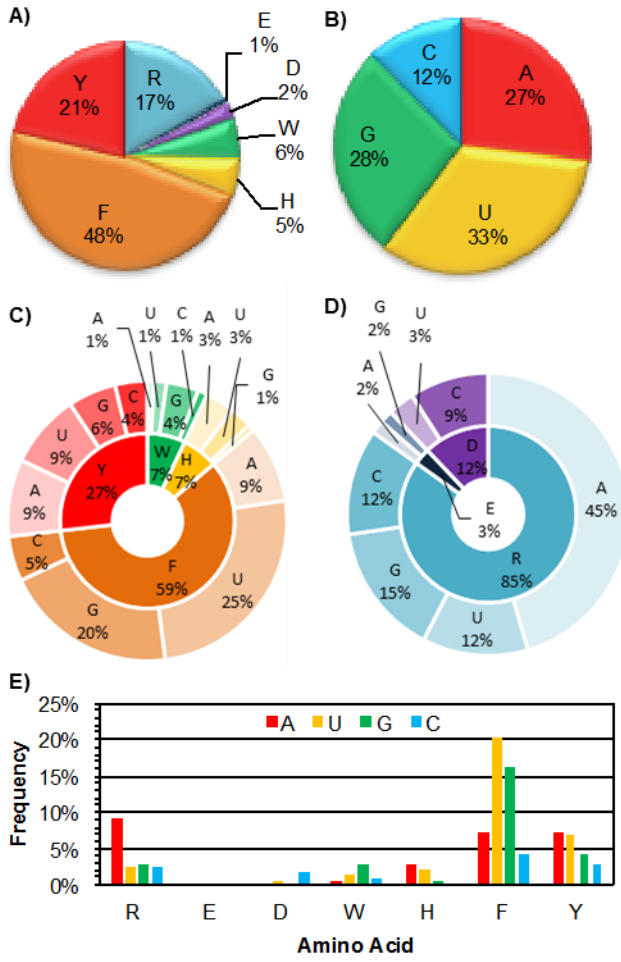

Supplementary Figure S7. Distribution in the composition of the RNA–protein  $\pi$ – $\pi$  contacts in the full dataset as a function of A) amino acid, B) nucleobase, C) the aromatic (cyclic) amino acids, D) the acyclic amino acids, and E) both (cyclic and acyclic) amino acid classes.

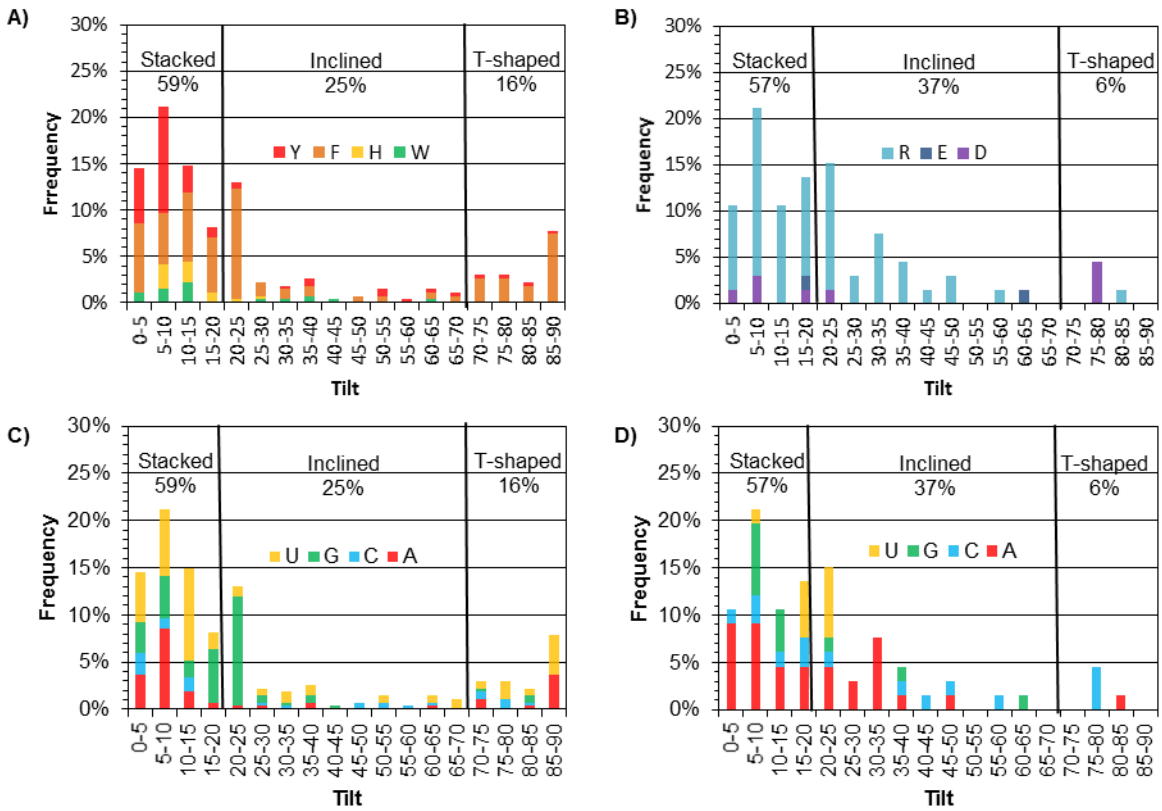

Supplementary Figure S8. Frequency of the tilt angle (degrees) between the ring planes for all  $\pi$ - $\pi$  interactions in the full dataset as a function of the protein (A and B) or RNA (C and D) component for the cyclic (A and C) and acyclic (B and D) amino acids.

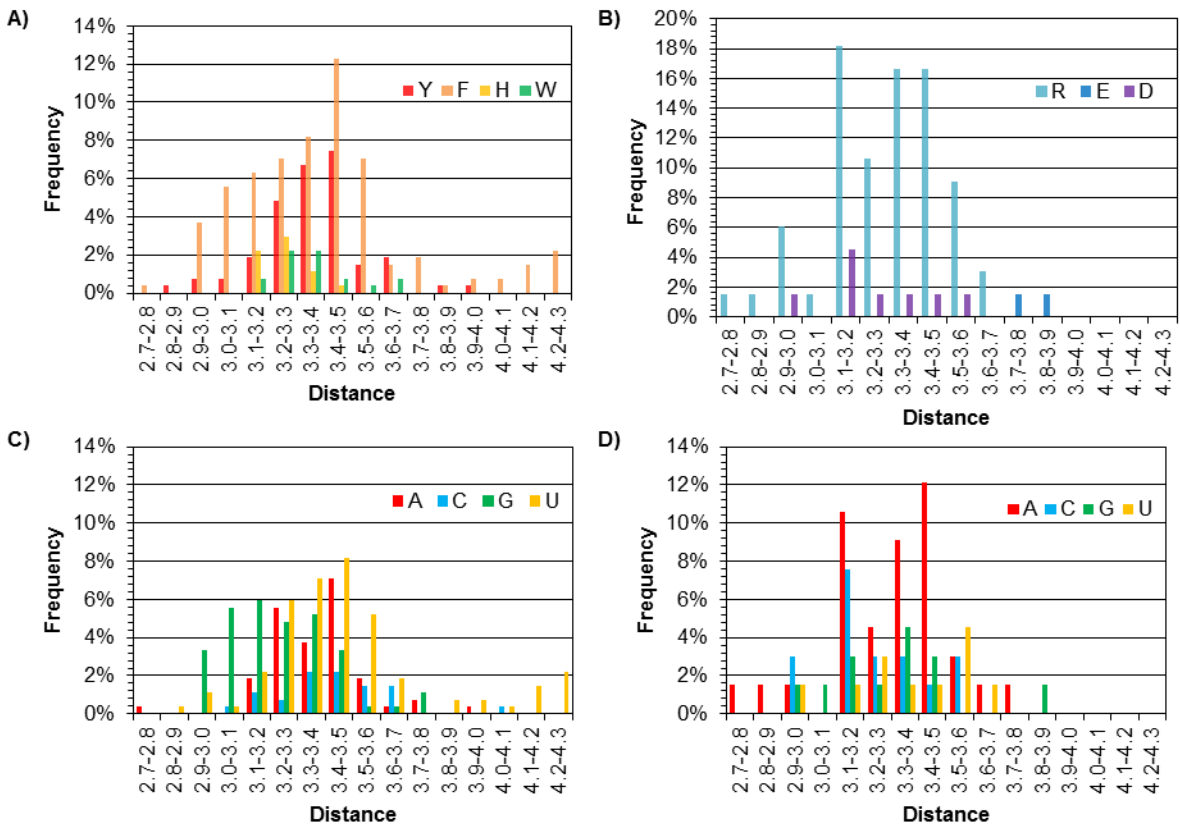

Supplementary Figure S9. Frequency of the closest heavy atom distance for  $\pi$ - $\pi$  contacts in the full dataset as a function of the protein (A and B) or RNA (C and D) component for the cyclic (A and C) and acyclic (B and D) amino acids.

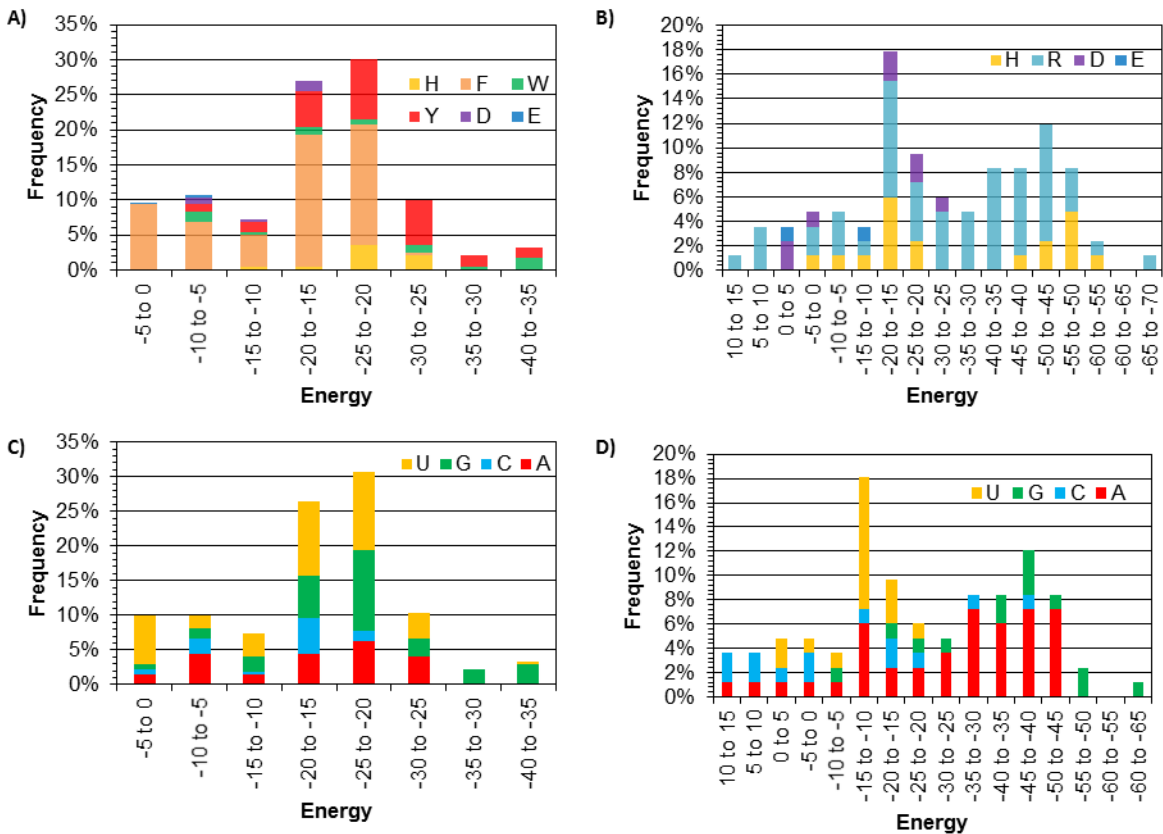

Supplementary Figure S10. Frequency of the binding energy ( $\text{kJ mol}^{-1}$ ) for nucleobase–amino acid  $\pi$ – $\pi$  interactions in the full dataset as a function of the protein (A and B) or RNA (C and D) component for the neutral (A and C) and charged (B and D)  $\pi$ –containing amino acids.

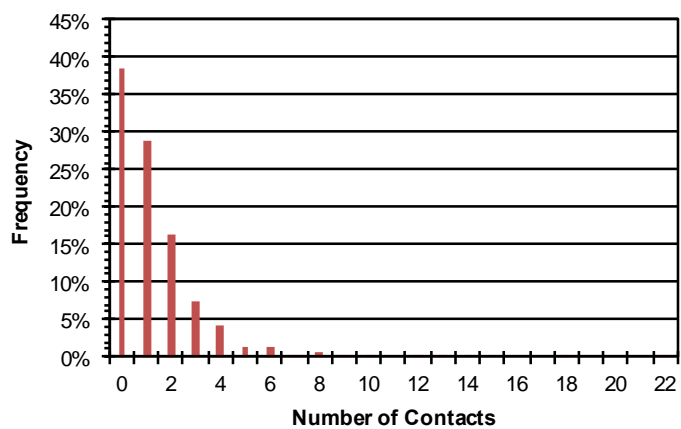

Supplementary Figure S11. Number of DNA–protein  $\pi$ - $\pi$  contacts found in each crystal structure searched regardless of the amino acid type.

**Supp. Table S5.** Full details of the crystal structures searched, the nucleobase–amino acid pairs identified and the classification of each  $\pi$ –interaction. An \* represents structures or interactions removed from the dataset to obtain the non-redundant dataset.

| PDB ID | Amino Acid  |       |       | Nucleotide |       |       |
|--------|-------------|-------|-------|------------|-------|-------|
|        | Res ID      | Chain | Res # | Res ID     | Chain | Res # |
| 1A34   | No contacts |       |       |            |       |       |
| 1B2M   | E           | A     | 58    | G          | C     | 105   |
| 1B2M   | Y           | A     | 45    | G          | C     | 105   |
| *1B2M  | Y           | A     | 45    | G          | D     | 105   |
| *1C9S  | E           | L     | 36    | A          | W     | 105   |
| *1C9S  | F           | T     | 32    | A          | W     | 142   |
| *1C9S  | F           | N     | 32    | A          | W     | 112   |
| *1C9S  | F           | O     | 32    | A          | W     | 117   |
| *1C9S  | F           | M     | 32    | A          | W     | 107   |
| *1C9S  | F           | L     | 32    | A          | W     | 102   |
| *1C9S  | F           | V     | 32    | A          | W     | 152   |
| *1C9S  | F           | U     | 32    | A          | W     | 147   |
| *1C9S  | F           | S     | 32    | A          | W     | 137   |
| *1C9S  | F           | R     | 32    | A          | W     | 132   |
| *1C9S  | F           | Q     | 32    | A          | W     | 127   |
| *1C9S  | F           | N     | 32    | G          | W     | 111   |
| *1C9S  | F           | T     | 32    | G          | W     | 141   |
| *1C9S  | F           | M     | 32    | G          | W     | 106   |
| *1C9S  | F           | R     | 32    | G          | W     | 131   |
| *1C9S  | F           | O     | 32    | G          | W     | 116   |
| *1C9S  | F           | L     | 32    | G          | W     | 101   |
| *1C9S  | F           | V     | 32    | G          | W     | 151   |
| *1C9S  | F           | U     | 32    | G          | W     | 146   |
| *1C9S  | F           | S     | 32    | G          | W     | 136   |
| *1C9S  | F           | Q     | 32    | G          | W     | 126   |
| *1C9S  | F           | P     | 32    | G          | W     | 121   |
| *1DUL  | R           | A     | 50    | A          | B     | 140   |
| *1FXL  | F           | A     | 170   | U          | B     | 4     |
| *1FXL  | F           | A     | 84    | U          | B     | 10    |
| *1FXL  | F           | A     | 84    | U          | B     | 9     |
| *1FXL  | Y           | A     | 45    | U          | B     | 5     |
| *1FXL  | Y           | A     | 128   | U          | B     | 3     |
| 1GTF   | F           | O     | 32    | G          | W     | 118   |
| 1GTF   | F           | N     | 32    | G          | W     | 113   |
| 1GTF   | F           | M     | 32    | G          | W     | 108   |
| 1GTF   | F           | L     | 32    | G          | W     | 103   |
| 1GTF   | F           | V     | 32    | G          | W     | 153   |
| 1GTF   | F           | U     | 32    | G          | W     | 148   |
| 1GTF   | F           | T     | 32    | G          | W     | 143   |
| 1GTF   | F           | S     | 32    | G          | W     | 138   |
| 1GTF   | F           | R     | 32    | G          | W     | 133   |

| PDB ID | Amino Acid  |       |       | Nucleotide |       |       |
|--------|-------------|-------|-------|------------|-------|-------|
|        | Res ID      | Chain | Res # | Res ID     | Chain | Res # |
| 1GTF   | F           | O     | 32    | U          | W     | 119   |
| 1GTF   | F           | N     | 32    | U          | W     | 114   |
| 1GTF   | F           | M     | 32    | U          | W     | 109   |
| 1GTF   | F           | L     | 32    | U          | W     | 104   |
| 1GTF   | F           | V     | 32    | U          | W     | 154   |
| 1GTF   | F           | U     | 32    | U          | W     | 149   |
| 1GTF   | F           | T     | 32    | U          | W     | 144   |
| 1GTF   | F           | S     | 32    | U          | W     | 139   |
| 1GTF   | F           | R     | 32    | U          | W     | 134   |
| 1GTF   | F           | Q     | 32    | U          | W     | 129   |
| 1GTF   | F           | P     | 32    | U          | W     | 124   |
| 1H2C   | F           | A     | 125   | G          | R     | 2     |
| 1H2C   | Y           | A     | 171   | A          | R     | 3     |
| *1HQ1  | R           | A     | 50    | A          | B     | 140   |
| 1J1U   | F           | A     | 261   | G          | B     | 535   |
| 1JBS   | No contacts |       |       |            |       |       |
| 1JID   | R           | A     | 14    | G          | B     | 148   |
| 1JID   | R           | A     | 101   | G          | B     | 147   |
| 1K8W   | R           | A     | 141   | G          | B     | 412   |
| *1R9F  | W           | A     | 42    | C          | B     | 1     |
| *1R9F  | W           | A     | 39    | G          | C     | 19    |
| 1SDS   | No contacts |       |       |            |       |       |
| 1URN   | D           | A     | 92    | C          | P     | 12    |
| *1URN  | D           | C     | 92    | C          | R     | 12    |
| *1URN  | D           | B     | 92    | C          | Q     | 12    |
| 1URN   | F           | A     | 56    | A          | P     | 11    |
| *1URN  | F           | B     | 56    | A          | Q     | 11    |
| *1URN  | F           | C     | 56    | A          | R     | 11    |
| 1URN   | Y           | A     | 13    | C          | P     | 10    |
| *1URN  | Y           | C     | 13    | C          | R     | 10    |
| *1URN  | Y           | B     | 13    | C          | Q     | 10    |
| *1UTF  | F           | E     | 32    | A          | 4     | 104   |
| *1UTF  | F           | G     | 32    | G          | 6     | 103   |
| *1UTF  | F           | J     | 32    | G          | 9     | 103   |
| *1UTF  | F           | I     | 32    | G          | 8     | 103   |
| *1UTF  | F           | B     | 32    | G          | 1     | 103   |
| *1UTF  | F           | C     | 32    | G          | 2     | 103   |
| *1UTF  | F           | A     | 32    | G          | 0     | 103   |
| *1UTF  | F           | K     | 32    | G          | Z     | 103   |
| *1UTF  | F           | H     | 32    | G          | 7     | 103   |
| *1UTF  | F           | D     | 32    | G          | 3     | 103   |
| *1UTF  | F           | E     | 32    | G          | 4     | 103   |
| *1UTF  | F           | F     | 32    | G          | 5     | 103   |
| *1UTV  | F           | I     | 32    | G          | 8     | 103   |
| *1UTV  | F           | H     | 32    | G          | 7     | 103   |

| PDB ID | Amino Acid |       |             | Nucleotide |       |       |
|--------|------------|-------|-------------|------------|-------|-------|
|        | Res ID     | Chain | Res #       | Res ID     | Chain | Res # |
| *1UTV  | F          | E     | 32          | G          | 4     | 103   |
| *1UTV  | F          | F     | 32          | G          | 5     | 103   |
| *1UTV  | F          | D     | 32          | G          | 3     | 103   |
| *1UTV  | F          | C     | 32          | G          | 2     | 103   |
| *1UTV  | F          | B     | 32          | G          | 1     | 103   |
| *1UTV  | F          | A     | 32          | G          | 0     | 103   |
| *1UTV  | F          | K     | 32          | G          | Z     | 103   |
| *1UTV  | F          | J     | 32          | G          | 9     | 103   |
| *1UTV  | F          | G     | 32          | G          | 6     | 103   |
| *1UVJ  |            |       | No contacts |            |       |       |
| *1UVL  | R          | C     | 291         | C          | D     | 7     |
| *1UVL  | D          | A     | 399         | C          | B     | 7     |
| *1UVL  | D          | E     | 399         | C          | F     | 7     |
| *1UVL  | D          | C     | 399         | C          | D     | 7     |
| *1UVL  | F          | E     | 156         | U          | F     | 4     |
| *1UVL  | F          | A     | 156         | U          | B     | 4     |
| *1UVL  | F          | C     | 156         | U          | D     | 4     |
| 1UVM   | F          | C     | 156         | U          | F     | 5     |
| *1UVM  | F          | B     | 156         | U          | E     | 5     |
| *1UVM  | F          | A     | 156         | U          | D     | 5     |
| *1WMQ  |            |       | No contacts |            |       |       |
| *1WPU  |            |       | No contacts |            |       |       |
| *1ZH5  | F          | B     | 35          | U          | C     | 9     |
| *1ZH5  | F          | B     | 28          | U          | D     | 1     |
| *1ZH5  | F          | A     | 28          | U          | C     | 1     |
| *1ZH5  | F          | A     | 35          | U          | D     | 9     |
| *1ZH5  | Y          | B     | 23          | U          | C     | 8     |
| *1ZH5  | Y          | A     | 23          | U          | D     | 8     |
| 2ANR   |            |       | No contacts |            |       |       |
| 2ASB   |            |       | No contacts |            |       |       |
| 2B3J   | R          | A     | 70          | G          | F     | 37    |
| *2B3J  | R          | C     | 70          | G          | H     | 37    |
| *2B3J  | R          | B     | 70          | G          | E     | 37    |
| 2B3J   | F          | D     | 144         | C          | H     | 35    |
| *2B3J  | F          | A     | 144         | C          | E     | 35    |
| *2B3J  | F          | D     | 145         | G          | H     | 36    |
| *2B3J  | F          | C     | 145         | G          | G     | 36    |
| 2B3J   | F          | A     | 145         | G          | E     | 36    |
| 2F8K   |            |       | No contacts |            |       |       |
| 2JLV   |            |       | No contacts |            |       |       |
| 2NUG   |            |       | No contacts |            |       |       |
| 2PO1   | H          | A     | 66          | A          | C     | 395   |
| *2PXB  | R          | A     | 50          | A          | B     | 140   |
| *2PXD  | R          | A     | 50          | A          | B     | 140   |
| *2PXE  | R          | A     | 50          | A          | B     | 140   |

| PDB ID | Amino Acid |       |             | Nucleotide |       |       |
|--------|------------|-------|-------------|------------|-------|-------|
|        | Res ID     | Chain | Res #       | Res ID     | Chain | Res # |
| *2PXF  | R          | A     | 50          | A          | B     | 140   |
| *2PXK  | R          | A     | 50          | A          | B     | 140   |
| *2PXV  | R          | A     | 50          | A          | B     | 140   |
| 2Q66   | H          | A     | 314         | A          | X     | 3     |
| 2Q66   | F          | A     | 140         | A          | X     | 3     |
| 2R8S   | D          | H     | 109         | U          | R     | 130   |
| 2R8S   | Y          | H     | 106         | U          | R     | 130   |
| 2R8S   | Y          | L     | 49          | U          | R     | 130   |
| 2VOO   | F          | A     | 35          | U          | C     | -1    |
| *2VOO  | F          | B     | 35          | U          | D     | -1    |
| *2VOO  | F          | B     | 55          | U          | D     | -1    |
| 2VOO   | F          | A     | 55          | U          | C     | -1    |
| 2VOO   | Y          | A     | 23          | U          | C     | -2    |
| *2VOO  | Y          | B     | 23          | U          | D     | -2    |
| 2X1F   | H          | A     | 109         | G          | B     | 1     |
| 2X1F   | Y          | A     | 21          | G          | B     | 1     |
| *2XLK  |            |       | No contacts |            |       |       |
| 2XNR   | F          | A     | 333         | C          | C     | 2     |
| 2XNR   | F          | A     | 368         | U          | C     | 3     |
| *2XS2  | R          | A     | 115         | U          | B     | 5     |
| *2XS2  | F          | A     | 43          | U          | B     | 4     |
| *2XS2  | F          | A     | 84          | U          | B     | 5     |
| *2XS5  | R          | A     | 115         | U          | C     | 4     |
| *2XS5  | R          | B     | 115         | U          | D     | 4     |
| *2XS5  | F          | A     | 84          | U          | C     | 4     |
| *2XS5  | F          | A     | 43          | U          | C     | 3     |
| *2XS5  | F          | B     | 43          | U          | D     | 3     |
| *2XS5  | F          | B     | 84          | U          | D     | 4     |
| *2XS5  | Y          | B     | 88          | C          | C     | 5     |
| *2XS5  | Y          | A     | 88          | C          | D     | 5     |
| 2XS7   | R          | A     | 115         | U          | B     | 5     |
| 2XS7   | F          | A     | 84          | U          | B     | 5     |
| 2XS7   | F          | A     | 43          | U          | B     | 4     |
| 2Y8W   |            |       | No contacts |            |       |       |
| *2Y8Y  |            |       | No contacts |            |       |       |
| 2ZKO   |            |       | No contacts |            |       |       |
| 2ZUE   | Y          | A     | 85          | A          | B     | 920   |
| 2ZUE   | Y          | A     | 587         | C          | B     | 935   |
| 3B0U   |            |       | No contacts |            |       |       |
| 3BOY   |            |       | No contacts |            |       |       |
| *3BSN  |            |       | No contacts |            |       |       |
| *3BSO  |            |       | No contacts |            |       |       |
| 3D2S   | F          | D     | 202         | C          | H     | 3     |
| 3D2S   | F          | B     | 202         | C          | F     | 3     |
| 3D2S   | F          | A     | 202         | G          | E     | 5     |



| PDB ID | Amino Acid |       |             | Nucleotide |       |       |
|--------|------------|-------|-------------|------------|-------|-------|
|        | Res ID     | Chain | Res #       | Res ID     | Chain | Res # |
| 3DD2   | R          | H     | 233         | A          | B     | 7     |
| 3DD2   | R          | H     | 165         | A          | B     | 15    |
| 3EQT   | F          | A     | 601         | C          | D     | 8     |
| *3EQT  | F          | B     | 601         | C          | C     | 8     |
| 3G9Y   | W          | A     | 79          | G          | C     | 2     |
| 3G9Y   | W          | A     | 79          | G          | C     | 3     |
| *3GPQ  | R          | B     | 144         | A          | F     | 1     |
| 3GPQ   | R          | A     | 144         | A          | E     | 1     |
| *3H5X  |            |       | No contacts |            |       |       |
| 3H5Y   |            |       | No contacts |            |       |       |
| *3I5X  | F          | A     | 576         | U          | B     | 1     |
| *3I5X  | F          | A     | 224         | U          | B     | 10    |
| *3I62  | F          | A     | 576         | U          | B     | 1     |
| 3IEV   | W          | A     | 280         | A          | D     | 1534  |
| 3IEV   | Y          | A     | 276         | C          | D     | 1538  |
| 3IEV   | Y          | A     | 276         | U          | D     | 1537  |
| *3K62  | R          | A     | 288         | A          | B     | 7     |
| *3K62  | H          | A     | 326         | A          | B     | 7     |
| *3K62  | H          | A     | 454         | U          | B     | 3     |
| *3K62  | Y          | A     | 245         | C          | B     | 9     |
| *3K62  | Y          | A     | 416         | G          | B     | 4     |
| *3K62  | Y          | A     | 501         | G          | B     | 2     |
| *3K62  | Y          | A     | 245         | U          | B     | 8     |
| *3K64  | R          | A     | 288         | A          | B     | 7     |
| *3K64  | H          | A     | 326         | A          | B     | 7     |
| *3K64  | H          | A     | 454         | U          | B     | 3     |
| *3K64  | Y          | A     | 501         | G          | B     | 2     |
| *3K64  | Y          | A     | 416         | G          | B     | 4     |
| *3K64  | Y          | A     | 245         | U          | B     | 9     |
| 3L25   | F          | E     | 239         | C          | C     | 1     |
| *3L25  | F          | B     | 239         | C          | F     | 1     |
| 3LQX   | R          | A     | 50          | A          | B     | 140   |
| *3NMR  | D          | A     | 187         | U          | B     | 4     |
| *3NMR  | F          | A     | 111         | G          | B     | 3     |
| *3NMR  | F          | A     | 111         | U          | B     | 4     |
| *3NMR  | F          | A     | 152         | U          | B     | 5     |
| 3NNA   | F          | A     | 111         | G          | B     | 3     |
| 3NNA   | F          | A     | 152         | U          | B     | 5     |
| 3NNA   | F          | A     | 111         | U          | B     | 4     |
| 3O8C   | W          | A     | 501         | U          | C     | 7     |
| 3O8C   | W          | A     | 501         | U          | C     | 8     |
| 3OIN   | R          | A     | 129         | A          | C     | 8     |
| 3OIN   | R          | A     | 136         | C          | C     | 7     |
| *3OVA  |            |       | No contacts |            |       |       |
| 3OVB   |            |       | No contacts |            |       |       |

| PDB ID | Amino Acid |       |             | Nucleotide |       |       |
|--------|------------|-------|-------------|------------|-------|-------|
|        | Res ID     | Chain | Res #       | Res ID     | Chain | Res # |
| *3PEW  |            |       | No contacts |            |       |       |
| 3PEY   |            |       | No contacts |            |       |       |
| *3PF4  | H          | B     | 29          | U          | R     | 1     |
| *3PF4  | F          | B     | 27          | C          | R     | 2     |
| *3PF4  | F          | B     | 17          | U          | R     | 3     |
| *3PF4  | W          | B     | 8           | U          | R     | 4     |
| 3PF5   | H          | B     | 29          | U          | R     | 1     |
| 3PF5   | F          | A     | 17          | U          | S     | 1     |
| 3PF5   | F          | B     | 27          | U          | R     | 2     |
| 3PF5   | F          | B     | 17          | U          | R     | 3     |
| 3PF5   | W          | B     | 8           | U          | R     | 4     |
| *3Q0Q  | R          | A     | 742         | A          | B     | 8     |
| *3Q0Q  | R          | A     | 814         | A          | B     | 6     |
| *3Q0Q  | R          | A     | 888         | A          | B     | 5     |
| *3Q0Q  | R          | A     | 888         | A          | B     | 4     |
| *3Q0Q  | H          | A     | 852         | A          | B     | 6     |
| *3Q0Q  | H          | A     | 852         | A          | B     | 5     |
| *3Q0Q  | Y          | A     | 778         | A          | B     | 8     |
| *3Q0Q  | Y          | A     | 924         | A          | B     | 4     |
| *3Q0Q  | Y          | A     | 1003        | G          | B     | 2     |
| *3Q0Q  | Y          | A     | 1003        | U          | B     | 1     |
| 3Q0R   | R          | A     | 742         | A          | B     | 8     |
| 3Q0R   | R          | A     | 814         | A          | B     | 6     |
| 3Q0R   | R          | A     | 888         | A          | B     | 4     |
| 3Q0R   | R          | A     | 888         | G          | B     | 5     |
| 3Q0R   | H          | A     | 852         | A          | B     | 6     |
| 3Q0R   | Y          | A     | 778         | A          | B     | 8     |
| 3Q0R   | Y          | A     | 924         | A          | B     | 4     |
| 3Q0R   | Y          | A     | 1003        | G          | B     | 2     |
| 3Q0R   | Y          | A     | 924         | U          | B     | 3     |
| *3Q0S  | R          | A     | 814         | A          | B     | 6     |
| *3Q0S  | R          | A     | 742         | C          | B     | 8     |
| *3Q0S  | R          | A     | 814         | U          | B     | 7     |
| *3Q0S  | H          | A     | 852         | A          | B     | 6     |
| *3Q0S  | H          | A     | 1039        | U          | B     | 1     |
| *3Q0S  | Y          | A     | 924         | A          | B     | 4     |
| *3Q0S  | Y          | A     | 778         | C          | B     | 8     |
| *3Q0S  | Y          | A     | 1003        | G          | B     | 2     |
| *3Q0S  | Y          | A     | 778         | U          | B     | 7     |
| *3Q0S  | Y          | A     | 1003        | U          | B     | 1     |
| 3QGC   | H          | A     | 454         | G          | B     | 2     |
| 3QGC   | H          | A     | 326         | U          | B     | 7     |
| 3QGC   | H          | A     | 454         | U          | B     | 3     |
| 3QGC   | Y          | A     | 245         | A          | B     | 9     |
| 3QGC   | Y          | A     | 416         | G          | B     | 4     |

| PDB ID | Amino Acid |       |             | Nucleotide |       |       |
|--------|------------|-------|-------------|------------|-------|-------|
|        | Res ID     | Chain | Res #       | Res ID     | Chain | Res # |
| 3QGC   | Y          | A     | 501         | G          | B     | 2     |
| 3QGC   | Y          | A     | 501         | U          | B     | 1     |
| 3QGC   | Y          | A     | 288         | U          | B     | 8     |
| 3R2C   | R          | A     | 102         | C          | R     | 3     |
| *3R2C  | R          | B     | 102         | C          | S     | 3     |
| 3R2C   | R          | A     | 102         | G          | R     | 1     |
| *3R2C  | R          | B     | 102         | G          | S     | 1     |
| 3R2C   | R          | J     | 16          | U          | R     | 8     |
| 3R2C   | F          | A     | 104         | U          | R     | 4     |
| 3R2C   | F          | A     | 122         | U          | R     | 8     |
| *3R2C  | F          | B     | 104         | U          | S     | 4     |
| *3R2C  | F          | B     | 122         | U          | S     | 8     |
| 3R2C   | W          | B     | 72          | G          | S     | 9     |
| *3RER  | F          | B     | 42          | A          | K     | 8     |
| *3RER  | F          | E     | 42          | U          | K     | 5     |
| *3RER  | F          | D     | 42          | U          | K     | 4     |
| *3RER  | F          | E     | 42          | U          | K     | 6     |
| *3RER  | F          | A     | 42          | U          | K     | 7     |
| 3SQW   |            |       | No contacts |            |       |       |
| 3T5N   | R          | A     | 300         | A          | C     | 3     |
| 3T5N   | R          | A     | 300         | U          | C     | 4     |
| 3T5N   | Y          | A     | 308         | A          | C     | 3     |
| *3U4M  |            |       | No contacts |            |       |       |
| 3UMY   | R          | A     | 129         | A          | B     | 2169  |
| 3WBM   |            |       | No contacts |            |       |       |
| 4AL5   | R          | A     | 115         | C          | B     | 9     |
| 4AL5   | R          | A     | 111         | C          | B     | 6     |
| 4AL5   | F          | A     | 158         | A          | B     | 5     |
| 4AL5   | F          | A     | 155         | G          | B     | 20    |
| 4ALP   | F          | A     | 77          | U          | E     | 1     |
| 4ALP   | F          | D     | 77          | U          | E     | 2     |
| 4ARC   | R          | A     | 416         | C          | B     | 75    |
| 4ARC   | R          | A     | 719         | U          | B     | 16    |
| 4ARC   | Y          | A     | 330         | C          | B     | 75    |
| 4C8Y   | H          | A     | 37          | A          | C     | 29    |
| 4D25   | F          | A     | 348         | A          | D     | 3     |
| *4ED5  | F          | B     | 151         | U          | C     | 4     |
| 4ED5   | F          | B     | 65          | U          | C     | 10    |
| 4ED5   | F          | A     | 151         | U          | D     | 4     |
| *4ED5  | Y          | B     | 26          | U          | C     | 5     |
| *4ED5  | Y          | B     | 109         | U          | C     | 3     |
| 4ED5   | Y          | A     | 109         | U          | D     | 3     |
| 4ED5   | Y          | A     | 26          | U          | D     | 5     |
| *4F02  | R          | D     | 94          | A          | E     | 6     |
| 4F02   | R          | D     | 179         | A          | E     | 3     |

| PDB ID | Amino Acid |       |             | Nucleotide |       |       |
|--------|------------|-------|-------------|------------|-------|-------|
|        | Res ID     | Chain | Res #       | Res ID     | Chain | Res # |
| 4F02   | R          | A     | 94          | A          | B     | 6     |
| 4F02   | F          | A     | 102         | A          | B     | 3     |
| 4F02   | F          | A     | 142         | A          | B     | 4     |
| *4F02  | F          | D     | 142         | A          | E     | 4     |
| *4F02  | F          | D     | 102         | A          | E     | 3     |
| 4F02   | Y          | A     | 56          | A          | B     | 8     |
| *4F02  | Y          | D     | 56          | A          | E     | 8     |
| *4F02  | Y          | D     | 14          | A          | E     | 6     |
| 4F02   | Y          | A     | 14          | A          | B     | 6     |
| *4GV3  | Y          | A     | 429         | G          | C     | 2     |
| 4GV6   | Y          | A     | 429         | G          | C     | 2     |
| *4HOR  | F          | A     | 339         | C          | X     | 3     |
| *4HOR  | F          | A     | 337         | C          | X     | 2     |
| 4HOS   | F          | A     | 337         | U          | X     | 2     |
| 4HOS   | F          | A     | 339         | U          | X     | 3     |
| *4HT8  | Y          | D     | 25          | A          | K     | 1     |
| *4HT8  | Y          | C     | 25          | A          | K     | 4     |
| *4HT8  | Y          | B     | 25          | A          | K     | 7     |
| *4HT8  | Y          | A     | 25          | A          | I     | 1     |
| *4HT8  | Y          | F     | 25          | A          | I     | 4     |
| *4HT8  | Y          | E     | 25          | A          | I     | 7     |
| 4HT9   | F          | B     | 42          | U          | E     | 5     |
| 4HT9   | F          | A     | 42          | U          | E     | 4     |
| 4HT9   | Y          | C     | 25          | A          | D     | 7     |
| 4HT9   | Y          | A     | 25          | A          | D     | 4     |
| 4HT9   | Y          | B     | 25          | A          | D     | 1     |
| 4I19   |            |       | No contacts |            |       |       |
| *4J39  | W          | A     | 20          | C          | B     | 1     |
| *4J7L  |            |       | No contacts |            |       |       |
| 4J7M   |            |       | No contacts |            |       |       |
| *4JGN  |            |       | No contacts |            |       |       |
| *4JNX  | W          | D     | 17          | G          | G     | 419   |
| *4JNX  | W          | A     | 17          | G          | B     | 419   |
| *4JNX  | W          | A     | 20          | G          | G     | 401   |
| *4JNX  | W          | D     | 20          | G          | B     | 401   |
| 4JZU   |            |       | No contacts |            |       |       |
| *4KNQ  |            |       | No contacts |            |       |       |
| 4KRE   | R          | A     | 708         | A          | R     | 9     |
| 4KRE   | F          | A     | 292         | A          | R     | 20    |
| 4KRE   | Y          | A     | 527         | A          | R     | 1     |
| 4KTG   | W          | A     | 17          | C          | E     | 219   |
| 4KTG   | W          | A     | 20          | G          | B     | 201   |
| 4LGT   |            |       | No contacts |            |       |       |
| 4M4O   |            |       | No contacts |            |       |       |
| 4MDX   | F          | B     | 10          | U          | C     | 2     |

| PDB ID | Amino Acid |       |             | Nucleotide |       |     |
|--------|------------|-------|-------------|------------|-------|-----|
|        | Res ID     | Chain | Res         | Res ID     | Chain | Res |
| 4NOT   | R          | A     | 38          | G          | B     | 50  |
| 4NOT   | F          | A     | 154         | A          | B     | 53  |
| 4NOT   | F          | A     | 154         | C          | B     | 58  |
| 4NOT   | F          | A     | 257         | C          | B     | 43  |
| 4NOT   | F          | A     | 292         | G          | B     | 55  |
| 4NOT   | F          | A     | 154         | U          | B     | 54  |
| 4NOT   | W          | A     | 120         | A          | B     | 49  |
| 4NOT   | Y          | A     | 162         | G          | B     | 50  |
| 4NGD   | F          | A     | 950         | U          | B     | 12  |
| *4NKU  | Y          | B     | 212         | U          | H     | 59  |
| 4NKU   | Y          | A     | 212         | U          | D     | 59  |
| *1GTF  | F          | Q     | 32          | G          | W     | 128 |
| 1GTF   | F          | P     | 32          | G          | W     | 123 |
| 4OHY   | W          | A     | 233         | G          | B     | 1   |
| 1DFU   | Y          | P     | 31          | A          | N     | 73  |
| 1DI2   |            |       | No contacts |            |       |     |
